# Supplementary material for: NO gas sensing at room temperature using single titanium oxide nanodot sensors created by atomic force microscopy nanolithography
Source: publisher site journal article supplement (doi:10.3762/bjnano.7.97), 2016-07-20
Supplement: Additional file 1 [file 2190-4286-7-97-S1.pdf]

## **Supporting Information**

for

### **NO gas sensing at room temperature using single titanium oxide nanodot sensors created by atomic force microscopy nanolithography**

Li-Yang Hong and Heh-Nan Lin\*

Address: Department of Materials Science and Engineering, National Tsing Hua University, Hsinchu 30013, Taiwan

Email: Heh-Nan Lin\*-hnlin@mx.nthu.edu.tw

\*Corresponding author

**Additional experimental data**

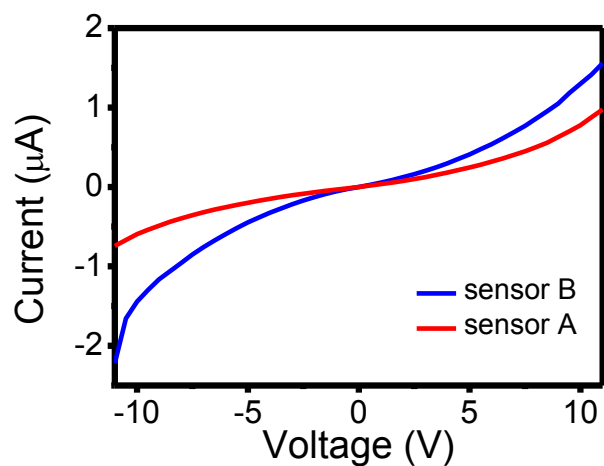

**Figure S1:** The current-voltage curves of sensors A and B before NO sensing.

**Table S1:** The resistances of sensors A and B before and after NO adsorption obtained from the current responses at a bias of 10 V as shown in the Figures.

| sensor | $C$ (ppm) | $I_0$ ( $\mu\text{A}$ ) | $I_g$ ( $\mu\text{A}$ ) | $R_0$ ( $\text{M}\Omega$ ) | $R_g$ ( $\text{M}\Omega$ ) | $\Delta R/R_0$ (%) |
|--------|-----------|-------------------------|-------------------------|----------------------------|----------------------------|--------------------|
| A      | 10        | 0.89                    | 0.68                    | 11.24                      | 14.7                       | 31                 |
|        | 15        | 0.89                    | 0.63                    | 11.24                      | 15.87                      | 41                 |
|        | 20        | 0.90                    | 0.59                    | 11.11                      | 16.95                      | 52                 |
| B      | 50        | 2                       | 1.83                    | 5                          | 5.46                       | 9                  |
|        | 100       | 2                       | 1.72                    | 5                          | 5.81                       | 16                 |
|        | 250       | 2                       | 1.58                    | 5                          | 6.33                       | 27                 |
|        | 500       | 2                       | 1.36                    | 5                          | 7.35                       | 47                 |

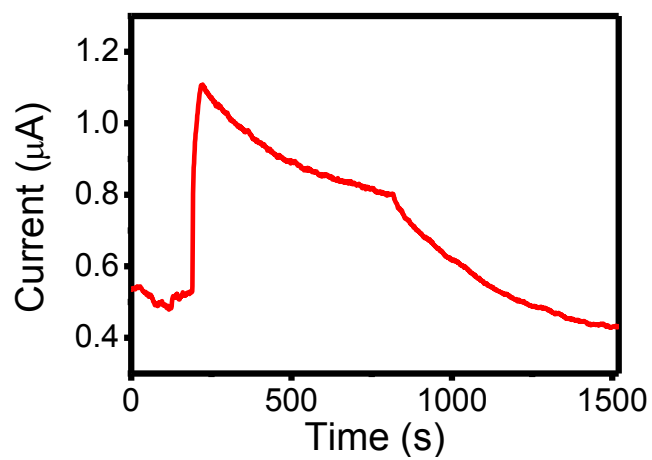

**Figure S2:** A finer time scale current response of sensor A at 10 V in the UV-recovery mode.

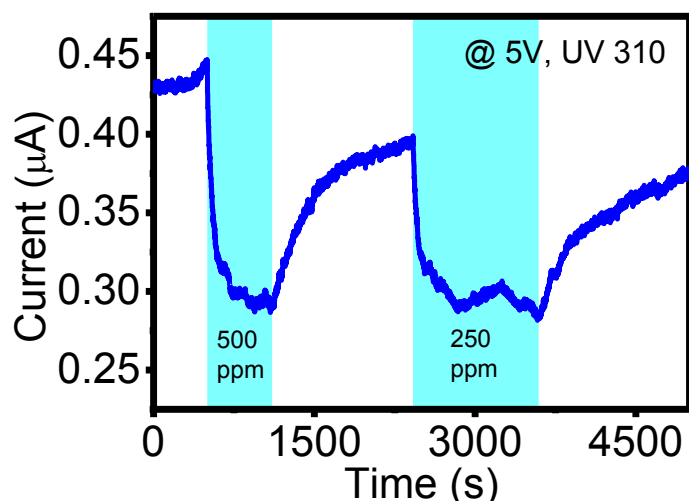

**Figure S3:** The current response of sensor B at 5 V in the UV-activation mode.

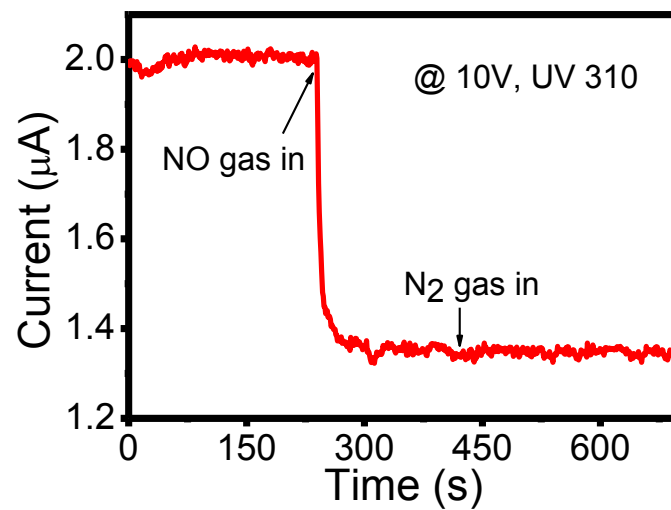

**Figure S4:** The current response of sensor B at 10 V due to the injection of 500 ppm NO and subsequent high-pressure N<sub>2</sub>.
